# Supplementary material for: Consumers&rsquo; Consciousness of Health-Friendly Products and Services and Its Association with Sociodemographic Characteristics and Health Status
Source: Preprints.org preprint supplement (doi:10.20944/preprints201905.0075.v1), 2019-05-07
Supplement: Supplementary file 1 [file supplementary]

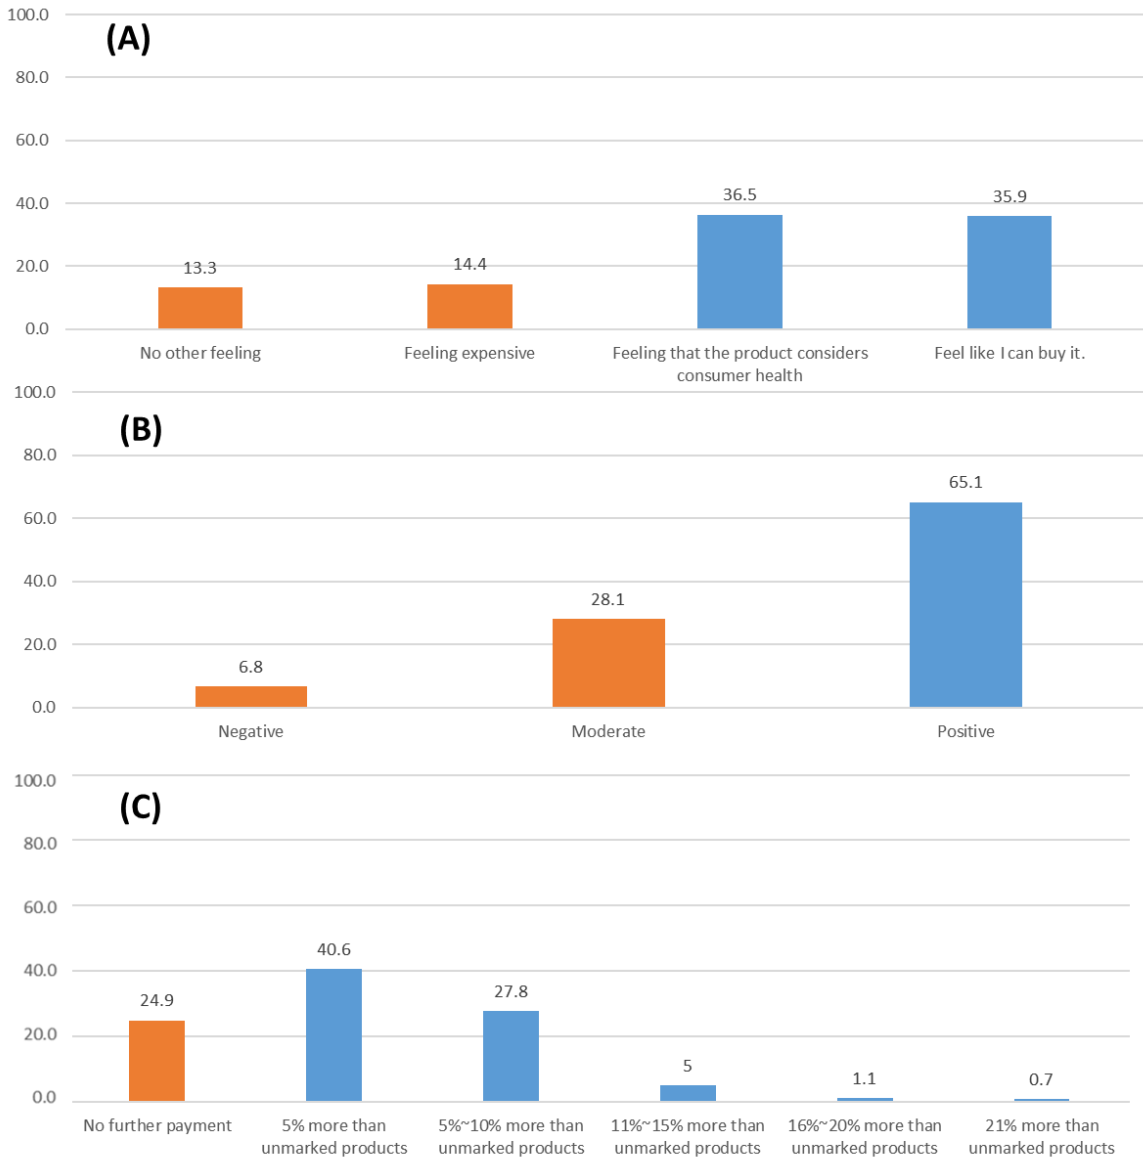

Figure 1. Proportions about participants' idea about Friendly Index Marked Products  
 (A) Consumer Reaction about Health Friendly Corporation  
 (B) Purchase Intention for Health Friendly Index Marked Products  
 (C) Additional Payment Intention for Health Friendly Index Marked Products
